# Supplementary material for: Bacterial and fungal components of the gut microbiome have distinct, sex-specific roles in Hawaiian Drosophila reproduction
Source: PubMed Central journal article supplement — bioRxiv. 2023 Jul 25:2023.07.14.549088. Preprint. [Version 4] doi: 10.1101/2023.07.14.549088 (PMC10370118; doi:10.1101/2023.07.14.549088), 2023-07-25
Supplement: media-1.pdf [file media-1.pdf]

**Supplemental Table 1.** Fatty acid (FA) content of control and antibacterial (AB)-treated females for each replicate.

| FA <sup>1,2</sup> | Control <sup>3</sup> |        |       |        |        | AB <sup>3</sup> |       |       |       |        |
|-------------------|----------------------|--------|-------|--------|--------|-----------------|-------|-------|-------|--------|
|                   | 1                    | 2      | 3     | 4      | 5      | 1               | 2     | 3     | 4     | 5      |
| C12:0             | 7.065                | 14.867 | 6.982 | 16.838 | 11.414 | 10.490          | 4.955 | 4.065 | 4.541 | 8.127  |
| C13:0             | 0.000                | 0.007  | 0.000 | 0.008  | 0.006  | 0.021           | 0.005 | 0.013 | 0.007 | 0.019  |
| C14:2             | 0.000                | 0.000  | 0.000 | 0.014  | 0.000  | 0.048           | 0.034 | 0.030 | 0.034 | 0.035  |
| C14:1a            | 0.228                | 0.418  | 0.261 | 0.577  | 0.519  | 0.718           | 0.454 | 0.419 | 0.330 | 0.584  |
| C14:1b            | 0.298                | 0.630  | 0.358 | 0.541  | 0.414  | 0.365           | 0.199 | 0.147 | 0.183 | 0.262  |
| C14:1c            | 1.727                | 3.693  | 1.842 | 3.700  | 2.557  | 1.847           | 0.934 | 0.537 | 0.791 | 1.334  |
| C14:0             | 8.727                | 19.662 | 7.362 | 21.489 | 15.970 | 15.950          | 7.959 | 7.231 | 6.827 | 13.608 |
| C16:1a            | 0.050                | 0.091  | 0.026 | 0.075  | 0.085  | 0.133           | 0.085 | 0.092 | 0.130 | 0.120  |
| C16:1b            | 2.957                | 5.606  | 2.624 | 5.264  | 4.116  | 3.302           | 1.933 | 1.560 | 2.068 | 2.773  |
| C16:0             | 6.246                | 12.740 | 6.149 | 13.205 | 10.163 | 10.955          | 7.045 | 6.994 | 8.022 | 10.142 |
| C17:0             | 0.028                | 0.021  | 0.017 | 0.034  | 0.021  | 0.028           | 0.020 | 0.030 | 0.020 | 0.030  |
| C18:2             | 0.104                | 0.173  | 0.109 | 0.191  | 0.126  | 0.293           | 0.285 | 0.336 | 0.279 | 0.294  |
| C18:1a            | 2.156                | 3.546  | 2.334 | 3.452  | 2.813  | 2.957           | 2.300 | 2.283 | 2.726 | 2.797  |
| C18:1b            | 0.142                | 0.217  | 0.170 | 0.197  | 0.148  | 0.074           | 0.040 | 0.010 | 0.005 | 0.077  |
| C18:0             | 0.914                | 1.192  | 1.009 | 1.309  | 1.099  | 1.168           | 0.987 | 0.916 | 0.985 | 1.389  |
| C20:0             | 0.148                | 0.194  | 0.150 | 0.160  | 0.121  | 0.118           | 0.091 | 0.103 | 0.092 | 0.130  |
| C22:0             | 0.021                | 0.019  | 0.010 | 0.018  | 0.013  | 0.015           | 0.009 | 0.011 | 0.005 | 0.015  |

<sup>1</sup>Notation indicates carbon chain length followed by number of double bonds. Positional isomers for C14:1, C16:1, and C18:1 FA species are indicated by "a", "b", and "c".

<sup>2</sup>Each replicate is comprised of homogenate from 5 flies.

<sup>3</sup>Raw abundance counts are normalized to the abundance of a spiked standard (pentadecanoic acid).

**Supplemental Table 2.** Fatty acid (FA) content of control and antibacterial (AB)-treated males for each replicate.

| FA <sup>1,2</sup> | Control <sup>3</sup> |        |       |       |       | AB <sup>3</sup> |       |       |       |       |
|-------------------|----------------------|--------|-------|-------|-------|-----------------|-------|-------|-------|-------|
|                   | 1                    | 2      | 3     | 4     | 5     | 1               | 2     | 3     | 4     | 5     |
| C10:0             | 0.023                | 0.020  | 0.014 | 0.000 | 0.016 | 0.037           | 0.026 | 0.013 | 0.020 | 0.023 |
| C12:0             | 3.983                | 3.124  | 2.684 | 0.820 | 2.894 | 8.086           | 3.626 | 1.999 | 3.463 | 3.393 |
| C13:0             | 0.022                | 0.012  | 0.018 | 0.000 | 0.013 | 0.032           | 0.015 | 0.000 | 0.013 | 0.027 |
| C14:1a            | 0.549                | 0.211  | 0.368 | 0.193 | 0.340 | 0.821           | 0.567 | 0.276 | 0.393 | 0.577 |
| C14:1b            | 0.239                | 0.183  | 0.158 | 0.081 | 0.162 | 0.363           | 0.338 | 0.247 | 0.310 | 0.365 |
| C14:1c            | 0.756                | 0.656  | 0.525 | 0.165 | 0.626 | 1.429           | 0.588 | 0.497 | 0.688 | 0.675 |
| C14:0             | 7.218                | 6.113  | 4.805 | 1.863 | 5.638 | 13.563          | 6.872 | 3.829 | 6.647 | 6.263 |
| C16:1a            | 0.139                | 0.084  | 0.109 | 0.075 | 0.108 | 0.248           | 0.181 | 0.089 | 0.115 | 0.161 |
| C16:1b            | 2.170                | 2.101  | 1.815 | 1.105 | 1.874 | 3.424           | 2.355 | 2.106 | 2.613 | 2.317 |
| C16:0             | 9.896                | 10.816 | 7.957 | 4.916 | 8.358 | 13.568          | 9.800 | 6.714 | 8.666 | 9.528 |
| C17:0             | 0.065                | 0.050  | 0.052 | 0.041 | 0.052 | 0.059           | 0.058 | 0.045 | 0.048 | 0.063 |
| C18:2             | 0.269                | 0.254  | 0.236 | 0.181 | 0.209 | 0.373           | 0.301 | 0.249 | 0.205 | 0.303 |
| C18:1a            | 3.071                | 2.617  | 2.579 | 1.936 | 2.447 | 3.774           | 2.838 | 2.415 | 2.539 | 2.883 |
| C18:1b            | 0.187                | 0.177  | 0.131 | 0.079 | 0.124 | 0.106           | 0.079 | 0.066 | 0.075 | 0.076 |
| C18:0             | 1.428                | 1.411  | 1.228 | 1.063 | 1.242 | 1.588           | 1.368 | 1.268 | 1.213 | 1.357 |
| C20:0             | 0.241                | 0.232  | 0.241 | 0.176 | 0.223 | 0.266           | 0.221 | 0.239 | 0.200 | 0.269 |
| C22:0             | 0.044                | 0.049  | 0.069 | 0.060 | 0.054 | 0.053           | 0.050 | 0.065 | 0.052 | 0.077 |

<sup>1</sup>Notation indicates carbon chain length followed by number of double bonds. Positional isomers for C14:1, C16:1, and C18:1 FA species are indicated by "a", "b", and "c".

<sup>2</sup>Each replicate is comprised of homogenate from 5 flies.

<sup>3</sup>Raw abundance counts are normalized to the abundance of a spiked standard (pentadecanoic acid).

**Supplemental Table 3.** Fatty acid (FA) content of control and antifungal (AF)-treated females for each replicate.

| FA <sup>1,2</sup> | Control <sup>3</sup> |        |       |        |       | AF <sup>3</sup> |        |        |        |        |
|-------------------|----------------------|--------|-------|--------|-------|-----------------|--------|--------|--------|--------|
|                   | 1                    | 2      | 3     | 4      | 5     | 1               | 2      | 3      | 4      | 5      |
| C10:0             | 0.104                | 0.150  | 0.000 | 0.189  | 0.000 | 0.000           | 0.104  | 0.000  | 0.099  | 0.041  |
| C12:0             | 12.266               | 22.722 | 9.747 | 16.916 | 8.545 | 12.991          | 15.785 | 10.605 | 17.472 | 10.048 |
| C13:0             | 0.023                | 0.039  | 0.015 | 0.022  | 0.013 | 0.030           | 0.030  | 0.017  | 0.033  | 0.019  |
| C14:2             | 0.031                | 0.046  | 0.040 | 0.028  | 0.024 | 0.042           | 0.026  | 0.000  | 0.042  | 0.022  |
| C14:1a            | 0.550                | 0.923  | 0.720 | 0.699  | 0.466 | 0.263           | 0.288  | 0.190  | 0.341  | 0.198  |
| C14:1b            | 0.369                | 0.612  | 0.438 | 0.423  | 0.337 | 0.337           | 0.360  | 0.257  | 0.397  | 0.226  |
| C14:1c            | 2.067                | 0.000  | 1.497 | 2.646  | 1.193 | 3.183           | 3.767  | 2.535  | 3.501  | 2.156  |
| C16:1a            | 0.107                | 0.125  | 0.114 | 0.122  | 0.078 | 0.091           | 0.071  | 0.072  | 0.087  | 0.054  |
| C16:1b            | 3.147                | 5.166  | 2.592 | 4.194  | 2.181 | 4.079           | 4.706  | 3.115  | 4.793  | 2.385  |
| C16:0             | 9.728                | 14.476 | 8.264 | 12.099 | 7.062 | 9.990           | 10.940 | 7.174  | 11.202 | 5.828  |
| C17:0             | 0.050                | 0.065  | 0.049 | 0.050  | 0.036 | 0.030           | 0.028  | 0.018  | 0.027  | 0.022  |
| C18:2             | 0.174                | 0.251  | 0.185 | 0.217  | 0.150 | 0.140           | 0.117  | 0.105  | 0.128  | 0.092  |
| C18:1a            | 2.401                | 3.353  | 2.549 | 2.990  | 1.989 | 2.160           | 2.278  | 1.811  | 2.505  | 1.368  |
| C18:1b            | 0.092                | 0.138  | 0.086 | 0.107  | 0.082 | 0.080           | 0.075  | 0.000  | 0.073  | 0.051  |
| C18:0             | 1.248                | 1.581  | 1.409 | 1.364  | 0.963 | 0.890           | 0.935  | 0.811  | 0.965  | 0.741  |
| C19:0             | 0.028                | 0.042  | 0.036 | 0.026  | 0.017 | 0.025           | 0.022  | 0.000  | 0.021  | 0.014  |
| C20:0             | 0.403                | 0.477  | 0.364 | 0.439  | 0.285 | 0.359           | 0.308  | 0.229  | 0.332  | 0.234  |
| C22:0             | 0.143                | 0.140  | 0.109 | 0.151  | 0.097 | 0.119           | 0.101  | 0.082  | 0.101  | 0.083  |

<sup>1</sup>Notation indicates carbon chain length followed by number of double bonds. Positional isomers for C14:1, C16:1, and C18:1 FA species are indicated by "a", "b", and "c".

<sup>2</sup>Each replicate is comprised of homogenate from 5 flies.

<sup>3</sup>Raw abundance counts are normalized to the abundance of a spiked standard (pentadecanoic acid).

**Supplemental Table 4.** Fatty acid (FA) content of control and antibacterial (AB)-treated males for each replicate.

| FA <sup>1,2</sup> | Control <sup>3</sup> |       |       |       |       | AF <sup>3</sup> |        |        |        |        |
|-------------------|----------------------|-------|-------|-------|-------|-----------------|--------|--------|--------|--------|
|                   | 1                    | 2     | 3     | 4     | 5     | 1               | 2      | 3      | 4      | 5      |
| C10:0             | 0.000                | 0.034 | 0.000 | 0.000 | 0.040 | 0.128           | 0.084  | 0.126  | 0.128  | 0.099  |
| C12:0             | 1.237                | 2.106 | 1.538 | 2.049 | 2.912 | 18.338          | 11.392 | 15.394 | 14.043 | 12.401 |
| C13:0             | 0.000                | 0.000 | 0.000 | 0.000 | 0.035 | 0.027           | 0.000  | 0.000  | 0.000  | 0.021  |
| C14:1a            | 0.163                | 0.261 | 0.055 | 0.086 | 0.098 | 0.436           | 0.300  | 0.340  | 0.319  | 0.323  |
| C14:1b            | 0.105                | 0.121 | 0.061 | 0.093 | 0.094 | 0.430           | 0.336  | 0.383  | 0.289  | 0.361  |
| C14:1c            | 0.219                | 0.222 | 0.235 | 0.320 | 0.496 | 2.371           | 1.590  | 1.879  | 1.298  | 2.064  |
| C14:0             | 1.647                | 2.906 | 2.126 | 2.893 | 3.807 | 15.036          | 9.881  | 11.775 | 11.224 | 13.129 |
| C16:1a            | 0.061                | 0.073 | 0.039 | 0.048 | 0.062 | 0.126           | 0.097  | 0.094  | 0.109  | 0.115  |
| C16:1b            | 1.015                | 1.205 | 1.026 | 1.302 | 1.631 | 2.910           | 2.229  | 2.375  | 1.908  | 2.673  |
| C16:0             | 4.831                | 6.299 | 4.662 | 5.684 | 7.136 | 7.786           | 5.180  | 6.122  | 6.089  | 7.336  |
| C17:0             | 0.040                | 0.049 | 0.032 | 0.030 | 0.046 | 0.028           | 0.000  | 0.026  | 0.025  | 0.030  |
| C18:2             | 0.203                | 0.269 | 0.131 | 0.140 | 0.213 | 0.205           | 0.143  | 0.167  | 0.209  | 0.190  |
| C18:1a            | 1.736                | 2.361 | 1.343 | 1.586 | 1.817 | 2.115           | 1.675  | 1.843  | 1.839  | 2.064  |
| C18:1b            | 0.105                | 0.152 | 0.083 | 0.095 | 0.114 | 0.152           | 0.158  | 0.184  | 0.181  | 0.159  |
| C18:0             | 0.874                | 1.083 | 0.859 | 0.861 | 0.983 | 0.966           | 0.870  | 0.947  | 0.998  | 0.970  |
| C20:0             | 0.196                | 0.233 | 0.136 | 0.162 | 0.173 | 0.266           | 0.222  | 0.249  | 0.263  | 0.274  |
| C22:0             | 0.064                | 0.072 | 0.045 | 0.051 | 0.069 | 0.069           | 0.066  | 0.072  | 0.070  | 0.072  |

<sup>1</sup>Notation indicates carbon chain length followed by number of double bonds. Positional isomers for C14:1, C16:1, and C18:1 FA species are indicated by "a", "b", and "c".

<sup>2</sup>Each replicate is comprised of homogenate from 5 flies.

<sup>3</sup>Raw abundance counts are normalized to the abundance of a spiked standard (pentadecanoic acid).

**Supplemental Table 5.** Fatty acid (FA) content of control and antibacterial and antifungal (AB+AF)-treated females for each replicate.

| FA <sup>1,2</sup> | Control <sup>3</sup> |        |        |        |        | AB+AF <sup>3</sup> |        |        |        |        |
|-------------------|----------------------|--------|--------|--------|--------|--------------------|--------|--------|--------|--------|
|                   | 1                    | 2      | 3      | 4      | 5      | 1                  | 2      | 3      | 4      | 5      |
| C12:0             | 8.412                | 17.665 | 17.424 | 15.381 | 17.827 | 18.195             | 11.926 | 15.477 | 15.780 | 13.357 |
| C14:1a            | 2.308                | 1.388  | 1.107  | 0.953  | 1.102  | 0.288              | 0.170  | 0.236  | 0.268  | 0.222  |
| C14:1b            | 1.843                | 0.690  | 0.645  | 0.497  | 0.553  | 0.271              | 0.166  | 0.210  | 0.204  | 0.177  |
| C14:1c            | 6.579                | 2.969  | 2.905  | 2.047  | 2.486  | 3.800              | 2.304  | 3.038  | 2.677  | 2.896  |
| C14:0             | 10.557               | 18.048 | 18.498 | 16.274 | 18.385 | 16.430             | 11.245 | 12.892 | 12.243 | 11.991 |
| C16:1a            | 0.588                | 0.217  | 0.206  | 0.198  | 0.179  | 0.133              | 0.061  | 0.100  | 0.071  | 0.081  |
| C16:1b            | 14.969               | 4.492  | 4.498  | 3.606  | 3.988  | 4.239              | 2.394  | 3.216  | 2.844  | 2.890  |
| C16:0             | 11.079               | 14.910 | 14.011 | 11.904 | 13.210 | 10.564             | 5.994  | 8.865  | 7.476  | 7.969  |
| C17:0             | 0.000                | 0.063  | 0.052  | 0.050  | 0.059  | 0.000              | 0.000  | 0.000  | 0.000  | 0.000  |
| C18:2             | 7.345                | 0.346  | 0.307  | 0.294  | 0.310  | 0.200              | 0.135  | 0.170  | 0.150  | 0.145  |
| C18:1a            | 26.397               | 3.832  | 3.717  | 3.034  | 3.373  | 2.574              | 1.461  | 2.244  | 1.966  | 1.714  |
| C18:1b            | 1.236                | 0.178  | 0.175  | 0.155  | 0.126  | 0.073              | 0.000  | 0.062  | 0.062  | 0.000  |
| C18:0             | 2.344                | 2.391  | 2.206  | 1.711  | 1.891  | 1.077              | 0.987  | 1.222  | 0.990  | 0.840  |
| C19:0             | 0.000                | 0.000  | 0.000  | 0.000  | 0.000  | 0.000              | 0.168  | 0.000  | 0.000  | 0.000  |
| C20:0             | 0.432                | 0.396  | 0.332  | 0.332  | 0.343  | 0.208              | 0.168  | 0.196  | 0.200  | 0.167  |

<sup>1</sup>Notation indicates carbon chain length followed by number of double bonds. Positional isomers for C14:1, C16:1, and C18:1 FA species are indicated by “a”, “b”, and “c”.

<sup>2</sup>Each replicate is comprised of homogenate from 5 flies.

<sup>3</sup>Raw abundance counts are normalized to the abundance of a spiked standard (pentadecanoic acid).

**Supplemental Table 6.** Fatty acid (FA) analysis of male testes in control and antibiotic and antifungal (AB+AF)-treated males for each replicate.

| FA <sup>1,2</sup> | Control <sup>3</sup> |       |       |       |       | AB+AF <sup>3</sup> |        |        |        |        |
|-------------------|----------------------|-------|-------|-------|-------|--------------------|--------|--------|--------|--------|
|                   | 1                    | 2     | 3     | 4     | 5     | 1                  | 2      | 3      | 4      | 5      |
| C10:0             | 0.029                | 0.027 | 0.538 | 0.033 | 0.017 | 0.184              | 0.055  | 0.136  | 0.151  | 0.157  |
| C12:0             | 2.170                | 1.713 | 0.731 | 2.627 | 2.401 | 17.762             | 9.845  | 15.572 | 17.372 | 17.656 |
| C13:0             | 0.000                | 0.012 | 0.000 | 0.000 | 0.000 | 0.035              | 0.023  | 0.047  | 0.024  | 0.049  |
| C14:1a            | 0.209                | 0.236 | 0.885 | 0.283 | 0.365 | 0.221              | 0.148  | 0.240  | 0.248  | 0.296  |
| C14:1b            | 0.100                | 0.138 | 0.885 | 0.168 | 0.227 | 0.220              | 0.150  | 0.188  | 0.240  | 0.241  |
| C14:1c            | 0.332                | 0.324 | 0.885 | 0.417 | 0.399 | 3.646              | 2.381  | 3.547  | 4.000  | 3.688  |
| C14:0             | 3.092                | 2.652 | 0.923 | 3.266 | 2.971 | 16.230             | 12.033 | 15.208 | 18.271 | 17.586 |
| C16:1a            | 0.064                | 0.079 | 1.038 | 0.083 | 0.087 | 0.080              | 0.030  | 0.117  | 0.054  | 0.081  |
| C16:1b            | 1.545                | 1.520 | 1.038 | 1.638 | 1.622 | 3.769              | 2.802  | 3.704  | 4.355  | 3.870  |
| C16:0             | 7.583                | 7.470 | 1.077 | 7.124 | 6.858 | 9.437              | 6.684  | 10.126 | 10.165 | 11.987 |
| C17:0             | 0.037                | 0.056 | 1.154 | 0.049 | 0.052 | 0.000              | 0.000  | 0.019  | 0.018  | 0.024  |
| C18:2             | 0.234                | 0.248 | 1.192 | 0.232 | 0.200 | 0.182              | 0.096  | 0.198  | 0.171  | 0.219  |
| C18:1a            | 2.685                | 2.623 | 1.192 | 2.492 | 2.512 | 2.504              | 1.488  | 2.377  | 2.420  | 2.630  |
| C18:1b            | 0.217                | 0.202 | 1.192 | 0.200 | 0.192 | 0.000              | 0.055  | 0.093  | 0.085  | 0.090  |
| C18:0             | 1.138                | 1.119 | 1.231 | 1.047 | 1.203 | 1.124              | 0.752  | 0.916  | 1.097  | 1.159  |
| C20:0             | 0.138                | 0.149 | 1.346 | 0.170 | 0.193 | 0.154              | 0.117  | 0.139  | 0.189  | 0.221  |
| C22:0             | 0.019                | 0.034 | 1.462 | 0.032 | 0.041 | 0.023              | 0.022  | 0.024  | 0.040  | 0.050  |

<sup>1</sup>Notation indicates carbon chain length followed by number of double bonds. Positional isomers for C14:1, C16:1, and C18:1 FA species are indicated by "a", "b", and "c".

<sup>2</sup>Each replicate is comprised of homogenate from 5 flies.

<sup>3</sup>Raw abundance counts are normalized to the abundance of a spiked standard (pentadecanoic acid).

**Supplemental Table 7.** Fatty acid (FA) analysis of male testes in control and antibiotic (AB)-treated males for each replicate.

| FA <sup>1,2</sup> | Control <sup>3</sup> |       |       |       | AB <sup>3</sup> |       |       |       |       |
|-------------------|----------------------|-------|-------|-------|-----------------|-------|-------|-------|-------|
|                   | 1                    | 2     | 3     | 4     | 1               | 2     | 3     | 4     | 5     |
| C10:0             | 0.000                | 0.005 | 0.000 | 0.000 | 0.002           | 0.000 | 0.000 | 0.001 | 0.001 |
| C12:0             | 0.024                | 0.050 | 0.036 | 0.146 | 0.011           | 0.021 | 0.027 | 0.013 | 0.021 |
| c14:1b            | 0.000                | 0.000 | 0.000 | 0.000 | 0.001           | 0.000 | 0.000 | 0.000 | 0.001 |
| c14:1c            | 0.000                | 0.004 | 0.000 | 0.014 | 0.001           | 0.000 | 0.005 | 0.001 | 0.005 |
| C14:0             | 0.050                | 0.085 | 0.065 | 0.223 | 0.021           | 0.045 | 0.066 | 0.025 | 0.043 |
| C16:1a            | 1.000                | 1.000 | 1.000 | 1.000 | 1.000           | 1.000 | 1.000 | 1.000 | 1.000 |
| C16:1b            | 0.000                | 0.000 | 0.000 | 0.000 | 0.001           | 0.000 | 0.000 | 0.001 | 0.002 |
| C16:0             | 0.006                | 0.033 | 0.013 | 0.024 | 0.014           | 0.033 | 0.036 | 0.017 | 0.027 |
| C17:0             | 0.777                | 1.025 | 1.063 | 1.115 | 0.921           | 0.698 | 0.594 | 0.634 | 0.633 |
| C18:2             | 0.009                | 0.014 | 0.010 | 0.010 | 0.009           | 0.008 | 0.007 | 0.008 | 0.008 |
| C18:1a            | 0.000                | 0.000 | 0.000 | 0.000 | 0.001           | 0.005 | 0.004 | 0.002 | 0.002 |
| C18:1b            | 0.014                | 0.047 | 0.030 | 0.032 | 0.036           | 0.098 | 0.083 | 0.049 | 0.044 |
| C18:0             | 0.000                | 0.012 | 0.017 | 0.019 | 0.003           | 0.000 | 0.000 | 0.003 | 0.008 |
| C20:0             | 0.361                | 0.469 | 0.485 | 0.406 | 0.457           | 0.253 | 0.213 | 0.257 | 0.241 |
| C22:0             | 0.008                | 0.016 | 0.009 | 0.008 | 0.006           | 0.008 | 0.007 | 0.005 | 0.010 |

<sup>1</sup>Notation indicates carbon chain length followed by number of double bonds. Positional isomers for C14:1, C16:1, and C18:1 FA species are indicated by "a", "b", and "c".

<sup>2</sup>Each replicate is comprised of homogenate from 5 flies.

<sup>3</sup>Raw abundance counts are normalized to the abundance of a spiked standard (pentadecanoic acid).

**Supplemental Table 8.** Fatty acid (FA) analysis of male testes from control and antifungal (AF)-treated males for each replicate.

| FA <sup>1,2</sup> | Control <sup>3</sup> |       |       |       |       | AF <sup>3</sup> |       |       |       |       |
|-------------------|----------------------|-------|-------|-------|-------|-----------------|-------|-------|-------|-------|
|                   | 1                    | 2     | 3     | 4     | 5     | 1               | 2     | 3     | 4     | 5     |
| C10:0             | 0.004                | 0.011 | 0.003 | 0.010 | 0.004 | 0.007           | 0.011 | 0.012 | 0.008 | 0.002 |
| C12:0             | 0.036                | 0.284 | 0.354 | 0.282 | 0.036 | 0.052           | 0.046 | 0.049 | 0.040 | 0.055 |
| C14:1a            | 0.000                | 0.000 | 0.010 | 0.004 | 0.000 | 0.000           | 0.000 | 0.000 | 0.000 | 0.000 |
| C14:1b            | 0.000                | 0.000 | 0.010 | 0.005 | 0.000 | 0.000           | 0.000 | 0.000 | 0.000 | 0.000 |
| C14:1c            | 0.003                | 0.030 | 0.062 | 0.024 | 0.003 | 0.000           | 0.000 | 0.000 | 0.000 | 0.004 |
| C14:0             | 0.038                | 0.238 | 0.350 | 0.248 | 0.038 | 0.079           | 0.062 | 0.060 | 0.047 | 0.059 |
| C16:1b            | 0.009                | 0.024 | 0.068 | 0.024 | 0.009 | 0.011           | 0.012 | 0.007 | 0.005 | 0.006 |
| C16:1c            | 0.000                | 0.000 | 0.008 | 0.000 | 0.000 | 0.000           | 0.000 | 0.000 | 0.000 | 0.002 |
| C16:0             | 0.678                | 0.987 | 0.921 | 0.965 | 0.678 | 1.112           | 1.367 | 1.144 | 1.302 | 0.714 |
| C17:0             | 0.008                | 0.023 | 0.007 | 0.014 | 0.008 | 0.026           | 0.024 | 0.025 | 0.015 | 0.006 |
| C18:1a            | 0.011                | 0.025 | 0.045 | 0.014 | 0.011 | 0.048           | 0.065 | 0.037 | 0.011 | 0.007 |
| C18:1b            | 0.005                | 0.013 | 0.013 | 0.010 | 0.005 | 0.023           | 0.029 | 0.018 | 0.010 | 0.006 |
| C18:0             | 0.254                | 0.506 | 0.259 | 0.333 | 0.254 | 0.604           | 0.815 | 0.608 | 0.627 | 0.256 |
| C20:0             | 0.004                | 0.025 | 0.005 | 0.014 | 0.004 | 0.030           | 0.034 | 0.025 | 0.015 | 0.003 |
| C22:0             | 0.000                | 0.003 | 0.000 | 0.003 | 0.000 | 0.009           | 0.013 | 0.000 | 0.000 | 0.000 |

<sup>1</sup>Notation indicates carbon chain length followed by number of double bonds. Positional isomers for C14:1, C16:1, and C18:1 FA species are indicated by “a”, “b”, and “c”.

<sup>2</sup>Each replicate is comprised of homogenate from 5 flies.

<sup>3</sup>Raw abundance counts are normalized to the abundance of a spiked standard (pentadecanoic acid).



**Supplemental Table 9.** Fatty acid (FA) analysis of male testes in control and antibiotic- and antifungal (AB+AF)-treated males for each replicate.

| FA <sup>1,2</sup> | Control <sup>3</sup> |       |       |       |       | AB+AF <sup>3</sup> |       |       |       |       |
|-------------------|----------------------|-------|-------|-------|-------|--------------------|-------|-------|-------|-------|
|                   | 1                    | 2     | 3     | 4     | 5     | 1                  | 2     | 3     | 4     | 5     |
| C12:0             | 0.013                | 0.012 | 0.011 | 0.010 | 0.015 | 0.265              | 0.035 | 0.183 | 0.118 | 0.110 |
| C14:1a            | 0.000                | 0.001 | 0.000 | 0.001 | 0.001 | 0.004              | 0.000 | 0.003 | 0.001 | 0.001 |
| C14:1b            | 0.000                | 0.000 | 0.000 | 0.000 | 0.000 | 0.005              | 0.000 | 0.003 | 0.001 | 0.001 |
| C14:1c            | 0.001                | 0.002 | 0.002 | 0.001 | 0.001 | 0.058              | 0.009 | 0.039 | 0.016 | 0.021 |
| C14:0             | 0.030                | 0.042 | 0.037 | 0.034 | 0.034 | 0.355              | 0.049 | 0.306 | 0.161 | 0.162 |
| C16:1a            | 0.002                | 0.002 | 0.000 | 0.002 | 0.002 | 0.003              | 0.000 | 0.002 | 0.001 | 0.000 |
| C16:1b            | 0.018                | 0.029 | 0.021 | 0.022 | 0.021 | 0.090              | 0.019 | 0.076 | 0.023 | 0.030 |
| C16:0             | 0.601                | 0.598 | 0.564 | 0.595 | 0.559 | 0.714              | 0.554 | 0.731 | 0.761 | 0.768 |
| C17:0             | 0.011                | 0.010 | 0.010 | 0.011 | 0.010 | 0.010              | 0.008 | 0.011 | 0.011 | 0.011 |
| C18:2             | 0.002                | 0.003 | 0.002 | 0.003 | 0.003 | 0.007              | 0.001 | 0.002 | 0.001 | 0.002 |
| C18:1a            | 0.048                | 0.067 | 0.051 | 0.052 | 0.062 | 0.079              | 0.030 | 0.068 | 0.027 | 0.033 |
| C18:1b            | 0.003                | 0.004 | 0.002 | 0.003 | 0.003 | 0.007              | 0.002 | 0.005 | 0.012 | 0.013 |
| C18:0             | 0.378                | 0.334 | 0.357 | 0.336 | 0.316 | 0.324              | 0.302 | 0.396 | 0.418 | 0.442 |
| C20:0             | 0.008                | 0.010 | 0.009 | 0.008 | 0.010 | 0.020              | 0.006 | 0.012 | 0.010 | 0.013 |

<sup>1</sup>Notation indicates carbon chain length followed by number of double bonds. Positional isomers for C14:1, C16:1, and C18:1 FA species are indicated by "a", "b", and "c".

<sup>2</sup>Each replicate is comprised of homogenate from 5 flies.

<sup>3</sup>Raw abundance counts are normalized to the abundance of a spiked standard (pentadecanoic acid).
