# Supplementary material for: Bacterial and fungal components of the gut microbiome have distinct, sex-specific roles in Hawaiian Drosophila reproduction
Source: PubMed Central journal article supplement — bioRxiv. 2023 Jul 25:2023.07.14.549088. Preprint. [Version 4] doi: 10.1101/2023.07.14.549088 (PMC10370118; doi:10.1101/2023.07.14.549088), 2023-07-25
Supplement: NIHPP2023.07.14.549088V4-supplement-1.pdf [file NIHPP2023.07.14.549088V4-supplement-1.pdf]

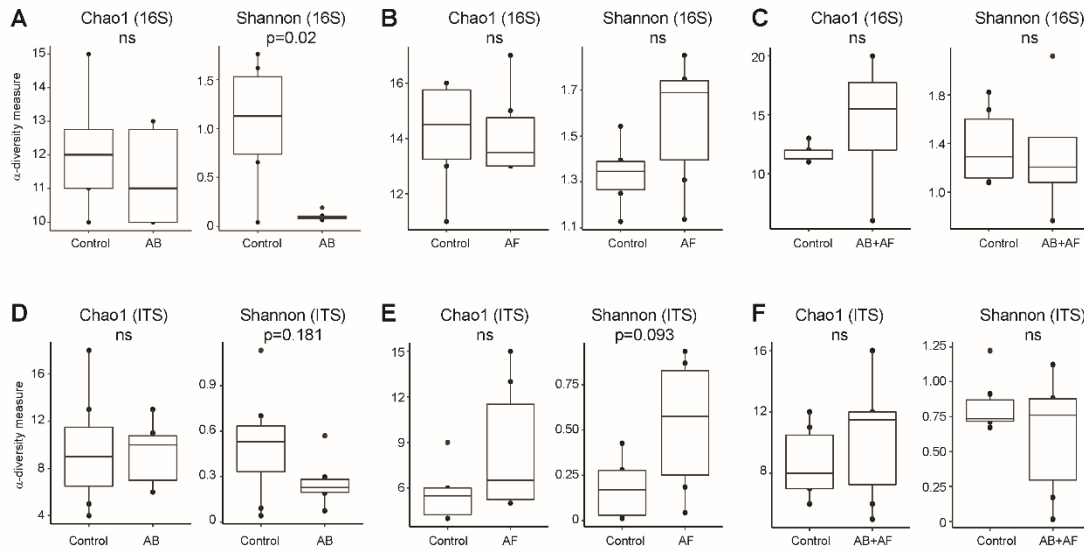

### Supplemental Figure 1

**A – F.** Chao1 and Shannon  $\alpha$ -diversity indices of bacterial (top row) and fungal communities (bottom row) in control and antimicrobial-treated flies.  $\alpha$ -diversity was compared using a Wilcoxon rank-sum test,  $n=6-8$  for all treatments; ns: not significant ( $p>0.05$ ).

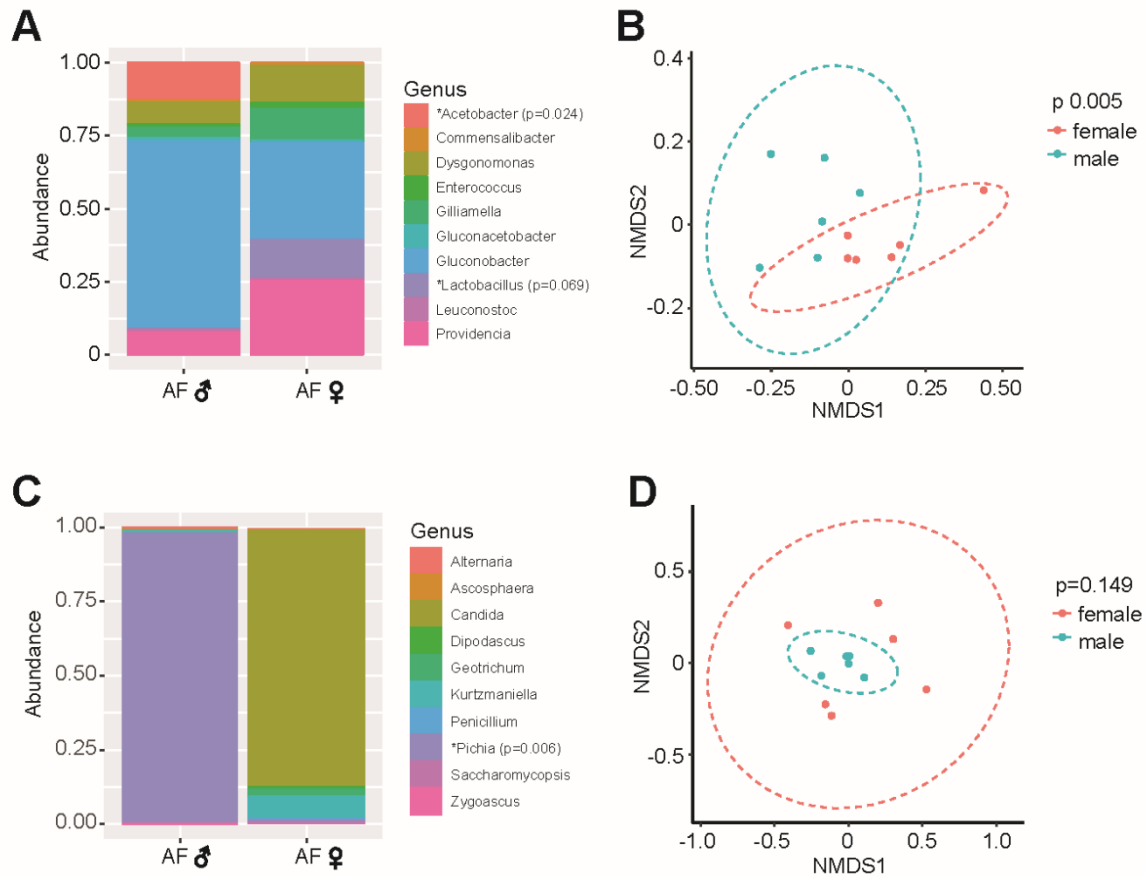

### Supplemental Figure 2

Comparison of male and female microbiome 16S and ITS high throughput sequencing amplicon profiles following antifungal treatment. Samples are comprised of flies that were treated for 21 and 35 days.

**A.** Scaled relative abundance plots for the 10 most abundant bacterial genera of males and females following antifungal (AF) treatment (n=6 per sex). The p values were determined using univariate multiple testing with an F test; \*: abundance is significantly different between control and treatment conditions.

**B.** Non-multidimensional scaling plots (NMDS; based on Jaccard distances) of OTUs reveal distinct bacterial communities in males and females following AF treatment (ANOSIM, n=6 per sex). Ellipses represent significance at 0.05 confidence.

**C.** Scaled relative abundance plots for the 10 most abundant fungal genera of males and females following antifungal (AF) treatment (n=6 per sex). The p values were determined using univariate multiple testing with an F test; \*: significantly different between control and treatment conditions.

**D.** Non-multidimensional scaling plots (NMDS; based on Jaccard distances) of OTUs show no significant separation in fungal composition between males and females (ANOSIM, n=6 per sex). Ellipses represent significance at 0.05 confidence.

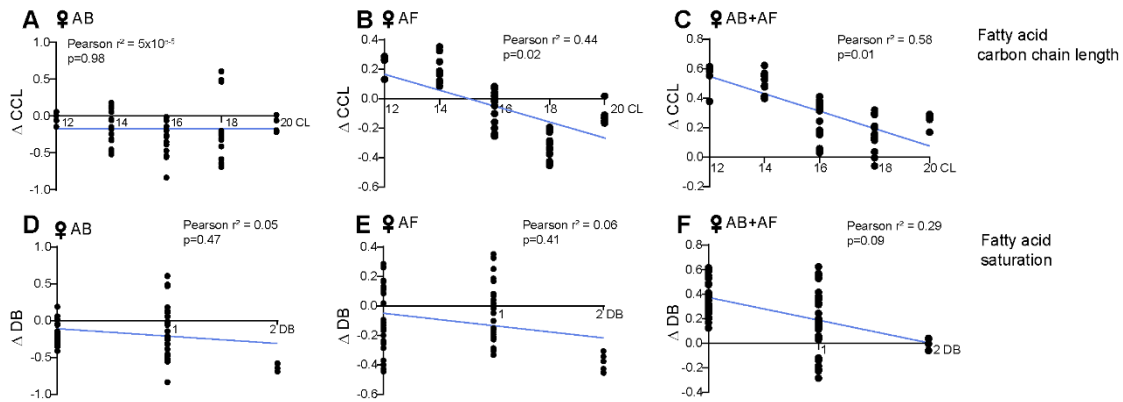

### Supplemental Figure 3

Influence of microbiome composition on female whole body fatty acid carbon chain length and degree of saturation. The Pearson  $r^2$  value and simple linear regression line are provided; n=3-5.

**A – C.** Change in whole body fatty acid carbon chain lengths (CCL) in antibacterial- (AB), antifungal- (AF), or AB+AF treated-females compared to controls.

**D – F.** Change in whole body fatty acid saturation levels in treated females compared to controls; DB: double bond number.

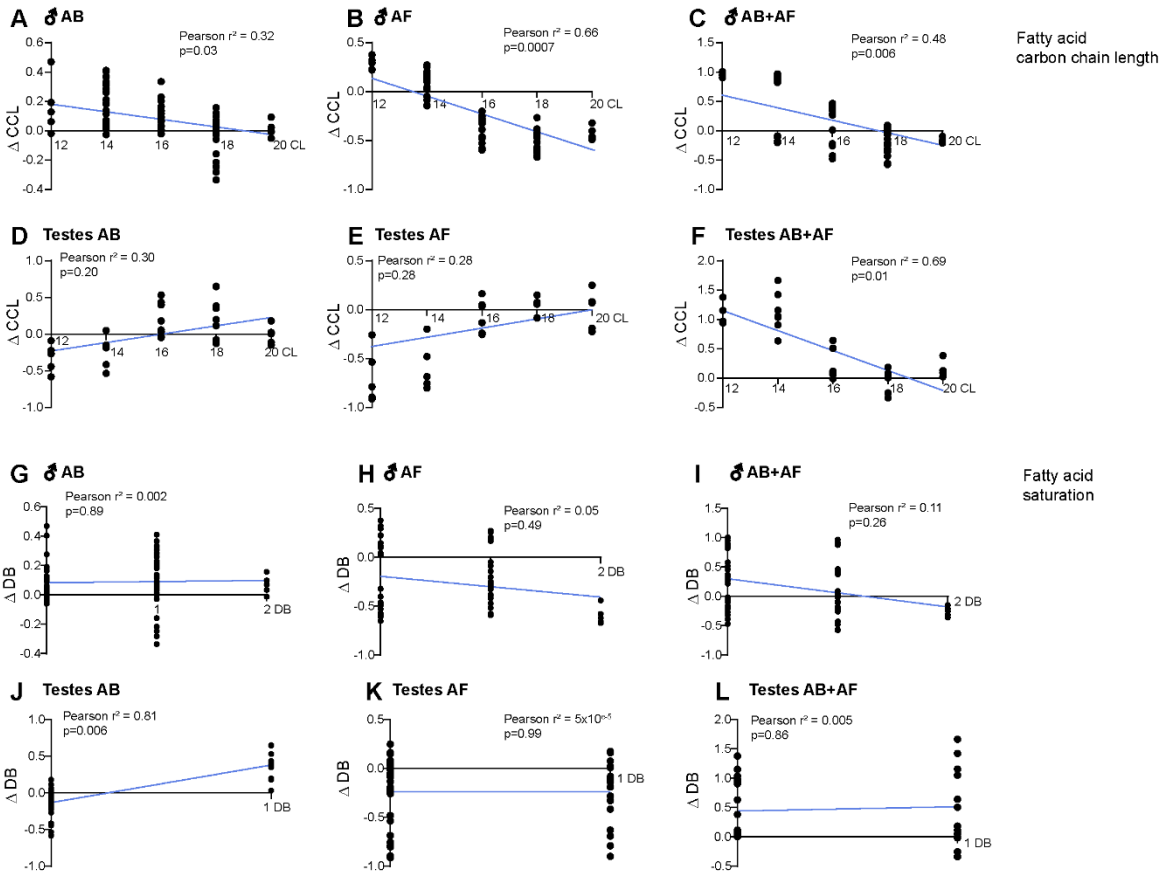

#### Supplemental Figure 4

Influence of microbiome composition on male whole body and testes fatty acid carbon chain length and degree of saturation. The Pearson  $r^2$  value and simple linear regression line are provided;  $n=3-5$ .

**A – C.** Change in whole body fatty acid carbon chain lengths (CCL) in antibacterial (AB), antifungal (AF), or AB+AF treated-males compared to controls.

**D – F.** Change in testes fatty acid carbon chain lengths (CCL) in antibacterial- (AB), antifungal- (AF), or AB+AF-treated males compared to controls.

**G – I.** Change in whole body fatty acid saturation levels in treated males compared to controls; DB: double bond number.

**J – L.** Change in testes fatty acid saturation levels in treated males compared to controls; DB: double bond number.
